# Supplementary figures and images for: Chiral discrimination by a cellulose polymer: differential crystallization inhibition of enantiomers in amorphous dispersions
Source: Royal Society of Chemistry journal article supplement (doi:10.1039/c5ce00810g), 2015-01-01

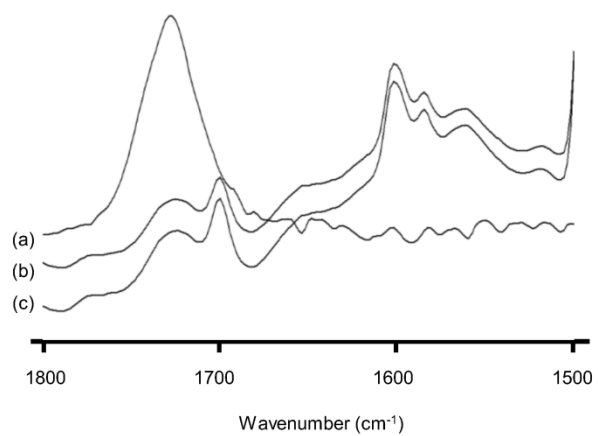

Figure S1. Carbonyl spectral region for (a) HPMCP and HPMC with (b) 30% ATP(S) and (c) 30% ATP(R)

Supplement: c5ce00810g1.pdf [file c5ce00810g1.pdf]
